# Supplementary material for: Structural isomerism in tris-tolyl halo-phosphonium and halo-arsonium tri-halides, [(CH3C6H4)3EX][X3], (E = P, As; X = Br, I)
Source: Royal Society of Chemistry journal article supplement (doi:10.1039/c2dt30235g), 2012-01-01
Supplement: c2dt30235g.pdf [file c2dt30235g.pdf]

**Supplementary data for paper: Structural isomerism in tris-tolyl halo-phosphonium and halo-arsonium tri-halides,  $[(\text{CH}_3\text{C}_6\text{H}_4)_3\text{EX}][\text{X}_3]$ , (E = P, As; X = Br, I).**

*Fatma B. Alhanash, Nicholas A. Barnes, Stephen M. Godfrey, Paul A. Hurst, Adrian Hutchinson, Rana Z. Khan and Robin G. Pritchard*

Weak anion–anion interactions in the structures of **1** and **2**:

The structure of **1** has no secondary I...I interactions within the sum of the van der Waals radii of two iodine atoms (3.96 Å), but does display a weak I(4)···I(1) interaction of 3.9684(18) Å from the terminal iodine atom at the other end of the  $[\text{I}_3]^-$  anion to an adjacent  $[(o\text{-CH}_3\text{C}_6\text{H}_4)_3\text{PI}]^+$  cation, which is at the van der Waals limit, see Fig. S1. In this way  $[\text{I}_3]^-$  anions loosely bridge adjacent cations and the situation is reminiscent of the isomer (C) type of structure where both ends of the  $[\text{I}_3]^-$  anion interact with  $[\text{R}_3\text{PI}]^+$  cations, although the second interaction is very much weaker than the first, and the angle of the weaker interaction to the second cation is different. In the extended structure of **2**, a second  $[(m\text{-CH}_3\text{C}_6\text{H}_4)_3\text{PI}]^+$  cation interacts to the terminal I(2) atom at the same end of the  $[\text{I}_3]^-$  anion as the shorter interaction, i.e. approaching the isomer (B) type of structure that was observed by Cotton and Kibala for  $[\{\text{Ph}_3\text{PI}\}_2\text{I}_3][\text{I}_3]$ , see Fig. S2. However this distance is very long at 4.267(2) Å.

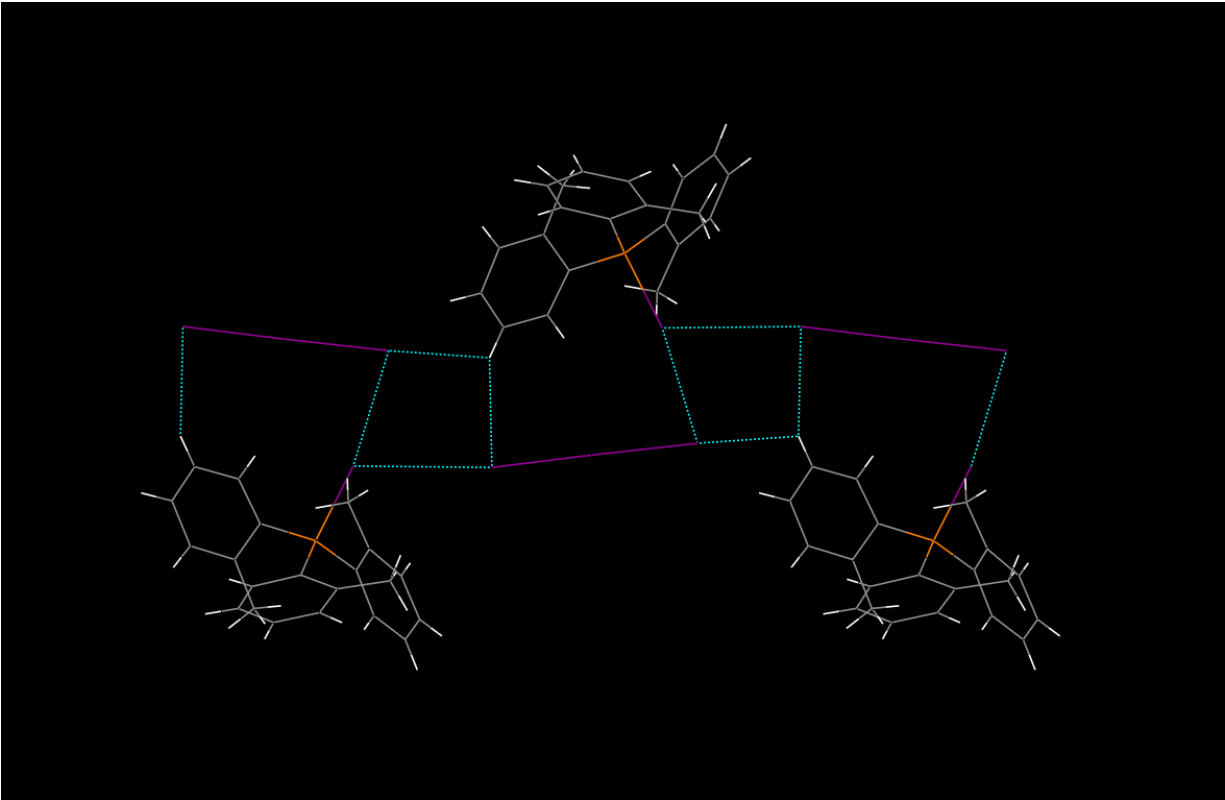

**Fig. S1** I...I contacts in the extended structure of  $[(o\text{-CH}_3\text{C}_6\text{H}_4)_3\text{PI}][\text{I}_3]$ , **1**.

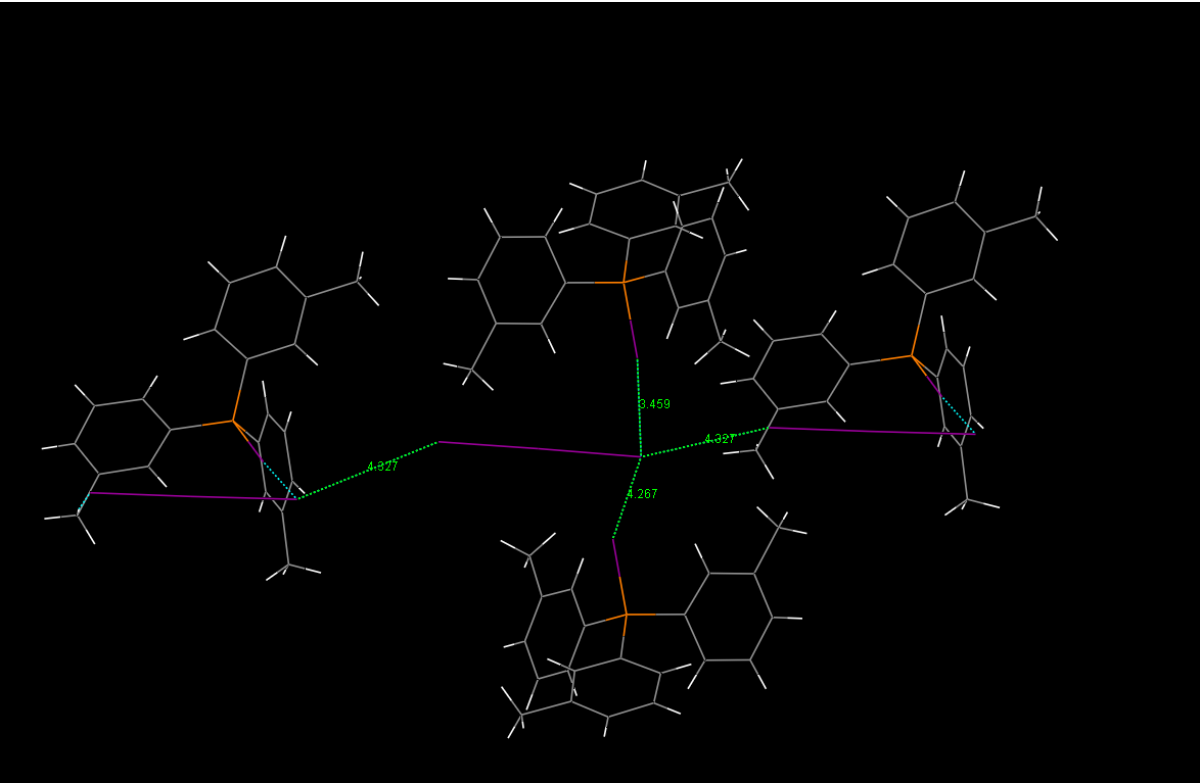

**Fig. S2** I···I contacts in the extended structure of  $[(m\text{-CH}_3\text{C}_6\text{H}_4)_3\text{PI}][\text{I}_3]$ , **2**.

Table of short X...H hydrogen bonds present in the structures of compounds **1** to **3** and **5**, to **12** (Table S1), and table of cation packing arrangements, and E...E separations, angles and torsions across the aryl embraces between [Ar<sub>3</sub>EX]<sup>+</sup> cations in the extended structures of **1** to **3** and **5** to **12**.

| Compound                                                                                                                         | Short X...H hydrogen bonds / Å <sup>a</sup>                                                                                                                                                                                                                       |
|----------------------------------------------------------------------------------------------------------------------------------|-------------------------------------------------------------------------------------------------------------------------------------------------------------------------------------------------------------------------------------------------------------------|
| [( <i>o</i> -CH <sub>3</sub> C <sub>6</sub> H <sub>4</sub> ) <sub>3</sub> PI][I <sub>3</sub> ] <b>1</b>                          | I(2)...H(9): 3.16                                                                                                                                                                                                                                                 |
| [( <i>m</i> -CH <sub>3</sub> C <sub>6</sub> H <sub>4</sub> ) <sub>3</sub> PI][I <sub>3</sub> ] <b>2</b>                          | None shorter than the sum of the van der Waals radii                                                                                                                                                                                                              |
| [{(p-CH <sub>3</sub> C <sub>6</sub> H <sub>4</sub> ) <sub>3</sub> PI] <sub>2</sub> I <sub>3</sub> ][I <sub>3</sub> ] <b>3</b>    | I(2)...H(7A): 3.16; I(5)...H(17): 3.17                                                                                                                                                                                                                            |
| [{(p-CH <sub>3</sub> C <sub>6</sub> H <sub>4</sub> ) <sub>3</sub> AsI] <sub>2</sub> I <sub>3</sub> ][I <sub>3</sub> ] <b>5</b>   | I(2)...H(14B): 3.18                                                                                                                                                                                                                                               |
| [Ph <sub>3</sub> AsI] <sub>2</sub> I <sub>3</sub> ][I <sub>3</sub> ] <b>6</b>                                                    | I(6)...H(18): 3.06                                                                                                                                                                                                                                                |
| [( <i>o</i> -CH <sub>3</sub> C <sub>6</sub> H <sub>4</sub> ) <sub>3</sub> PBr][Br <sub>3</sub> ] <b>7</b>                        | Br(2)...H(6): 2.93; Br(4)...H(18): 3.00                                                                                                                                                                                                                           |
| [{(m-CH <sub>3</sub> C <sub>6</sub> H <sub>4</sub> ) <sub>3</sub> PBr] <sub>2</sub> Br <sub>3</sub> ][Br <sub>3</sub> ] <b>8</b> | Br(2)...H(26): 2.97; Br(2)...H(13): 3.05; Br(5)...H(28C): 3.03; Br(6)...H(19): 2.94;<br>Br(6)...H(30): 2.92; Br(6)...H(34): 3.00; Br(8)...H(28B): 2.99; Br(8)...H(41): 2.89                                                                                       |
| [{(p-CH <sub>3</sub> C <sub>6</sub> H <sub>4</sub> ) <sub>3</sub> PBr] <sub>2</sub> Br <sub>3</sub> ][Br <sub>3</sub> ] <b>9</b> | Br(3)...H(16): 2.95; Br(4)...H(19): 2.90                                                                                                                                                                                                                          |
| [( <i>o</i> -CH <sub>3</sub> C <sub>6</sub> H <sub>4</sub> ) <sub>3</sub> AsBr][Br <sub>3</sub> ] <b>10</b>                      | Br(2)...H(6): 2.90; Br(4)...H(11): 3.05                                                                                                                                                                                                                           |
| [( <i>p</i> -CH <sub>3</sub> C <sub>6</sub> H <sub>4</sub> ) <sub>3</sub> AsBr][Br <sub>3</sub> ] <b>11</b>                      | Br(2)...H(20): 2.86; Br(2)...H(21C): 2.99; Br(3)...H(12): 3.01; Br(3)...H(26): 2.95;<br>Br(4)...H(13): 2.99; Br(4)...H(27): 2.94; Br(6)...H(23): 3.00; Br(6)...H(30): 2.88;<br>Br(7)...H(5): 3.02; Br(7)...H(24): 2.95; Br(8)...H(41): 2.95; Br(8)...H(42C): 3.01 |
| [Ph <sub>3</sub> AsBr][Br <sub>3</sub> ] <b>12</b>                                                                               | Br(3)...H(6): 2.95; Br(4)...H(9): 2.98                                                                                                                                                                                                                            |

<sup>a</sup> Sum of the van der Waals radii of iodine and hydrogen is 3.18 Å, sum of the van der Waals radii of bromine and hydrogen is 3.05 Å.

**Table S1** Details of non classical I...H and Br...H hydrogen bonding in the structures of **1** to **3** and **5** to **12**.

| Compound                                                                                                               | Packing arrangement of cations                                                                                                                 | Isomer type | E...E separation (Å) | E...E...E angle / ° | X– E...E–X torsion angle across embrace / ° |
|------------------------------------------------------------------------------------------------------------------------|------------------------------------------------------------------------------------------------------------------------------------------------|-------------|----------------------|---------------------|---------------------------------------------|
| $[(o\text{-CH}_3\text{C}_6\text{H}_4)_3\text{PI}][\text{I}_3]$ <b>1</b>                                                | side-to-side, anti-parallel, one (OFF), one (MF), forms a chain with square motif                                                              | A           | 7.417                | 131.87              | 167.29                                      |
| $[(m\text{-CH}_3\text{C}_6\text{H}_4)_3\text{PI}][\text{I}_3]$ <b>2</b>                                                | side-to-side, anti-parallel, one (OFF), one (EF), forms a chain with square motif                                                              | A           | 6.494                | 138.19              | 153.84                                      |
| $[\{(p\text{-CH}_3\text{C}_6\text{H}_4)_3\text{PI}\}_2\text{I}_3][\text{I}_3]$ <b>3</b>                                | side-to-side, anti-parallel, single (OFF) embrace, forms a chain with square motif                                                             | C           | 6.418                | 158.20              | –142.55                                     |
| $[\{(p\text{-CH}_3\text{C}_6\text{H}_4)_3\text{AsI}\}_2\text{I}_3][\text{I}_3]$ <b>5</b>                               | side-to-side, anti-parallel, single (OFF) embrace, forms a chain with square motif                                                             | C           | 6.422                | 158.47              | –142.09                                     |
| $[\{\text{Ph}_3\text{AsI}\}_2\text{I}_3][\text{I}_3]$ <b>6</b>                                                         | side-to-side, parallel, single (OFF) embrace, forms chains                                                                                     | B           | 6.328                | 152.81              | –9.62                                       |
| $[(o\text{-CH}_3\text{C}_6\text{H}_4)_3\text{PBr}][\text{Br}_3]$ <b>7</b>                                              | side-to-side, anti-parallel, one (OFF), one (MF), forms a chain with square motif                                                              | A           | 7.361                | 132.62              | 167.23                                      |
| $[\{(m\text{-CH}_3\text{C}_6\text{H}_4)_3\text{PBr}\}_2\text{Br}_3][\text{Br}_3]$ <b>8</b> (two independent molecules) | side-to-side, parallel, single (OFF) embrace, forms chains of alternating P(1) and P(2) cations – separations slightly different on each side. | C           | 6.935, 7.072         | 155.52<br>twice     | 139.79 / 135.78                             |
| $[\{(p\text{-CH}_3\text{C}_6\text{H}_4)_3\text{PBr}\}_2\text{Br}_3][\text{Br}_3]$ <b>9</b>                             | side-to-side, anti-parallel, single (OFF) embrace, forms a chain with square motif                                                             | C           | 6.578                | 156.15              | 145.25                                      |
| $[(o\text{-CH}_3\text{C}_6\text{H}_4)_3\text{AsBr}][\text{Br}_3]$ <b>10</b>                                            | side-to-side, anti-parallel, one (OFF), one (MF), forms a chain with square motif                                                              | A           | 7.389                | 133.18              | 167.96                                      |
| $[(p\text{-CH}_3\text{C}_6\text{H}_4)_3\text{AsBr}][\text{Br}_3]$ <b>11</b>                                            | side-to-side, anti-parallel, one (OFF), one (EF), chain of As(1) cations with square motif                                                     | A           | 5.790                | 157.61              | –168.04                                     |
| (two independent molecules)                                                                                            | side-to-side, anti-parallel, one (OFF), one (EF), chain of As(2) cations with square motif                                                     |             | 5.716                | 167.22              | 175.71                                      |
| $[\text{Ph}_3\text{AsBr}][\text{Br}_3]$ <b>12</b>                                                                      | side-to-side, anti-parallel, one (OFF), one (EF), forms a chain with square motif                                                              | A           | 5.751                | 141.81              | –168.53                                     |

**Table S2** Comparison of cation packing arrangements and E...E separations, angles and torsions across the aryl embraces between  $[\text{Ar}_3\text{EX}]^+$  cations in the extended structures of **1** to **3** and **5** to **12**. Key: (EF): edge-to-face aryl embrace, (OFF): offset face-to-face embrace, (MF): methyl-to-face embrace.
